# Supplementary material for: Effectiveness of guideline-based care by occupational physicians on the return-to-work of workers with common mental disorders: design of a cluster-randomised controlled trial
Source: PubMed Central journal article supplement (PMC3599838; doi:10.1186/1471-2458-13-193), 2013-03-06

# Vragenlijst

## Herstel na ziekteverzuim en werkhervatting

Leidinggevenden

|                   |   |        |
|-------------------|---|--------|
| Respondentnummer: |   |        |
| Datum versturen:  | - | - 2012 |
| Datum ontvangen:  | - | - 2012 |

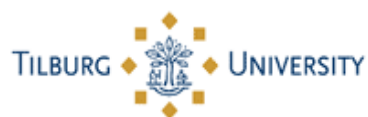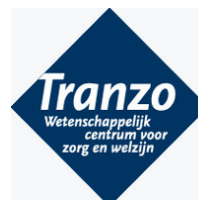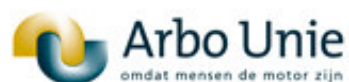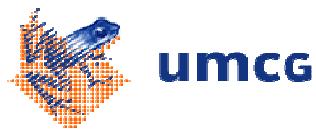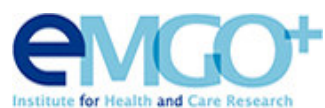

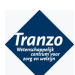

## **Introductie**

Dit is de vragenlijst van het onderzoek 'Herstel na ziekteverzuim en werkhervatting'.

In deze vragenlijst staan vragen over uw contact met uw werknemer die deelneemt aan het onderzoek, zijn/haar ziekteverzuim en zijn/haar werkhervatting. In deze vragenlijst verwijzen we naar deze persoon als 'uw werknemer'.

Bij de vragen kunt uw antwoorden invullen, aankruisen of omcirkelen. Vult u steeds het antwoord in dat het meest overeenkomt met uw situatie of dat het beste bij u past. Er zijn geen goede of foute antwoorden. Het gaat om uw mening. Vul per vraag slechts één antwoord in.

Uw antwoorden worden strikt vertrouwelijk behandeld. Uw antwoorden worden uitsluitend gebruikt voor het onderzoek en worden niet verstrekt aan uw werknemer of aan uw bedrijfsarts.

Het is belangrijk dat u geen vragen overslaat.

**Alvast hartelijk bedankt voor het invullen van de vragenlijst!**

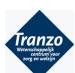

Datum invullen van vragenlijst (dd-mm-jjjj):

..... - ..... - 2012

### Contact met uw werknemer

De volgende vragen gaan over het contact dat u sinds de ziekmelding met uw werknemer hebt gehad.

1. Heeft u sinds de ziekmelding contact (per telefoon, per e-mail, een afspraak) gehad met uw werknemer?  
 Ja  
 Nee
  
2. Hoeveel contacten heeft u sinds de ziekmelding met uw werknemer gehad?  
..... aantal
  
3. Hoe lang geleden was het laatste contact met uw werknemer?  
 1 – 7 dagen geleden  
 8 – 14 dagen geleden  
 15 – 21 dagen geleden  
 22 – 28 dagen geleden  
 Langer dan 4 weken geleden
  
4. Hoe was uw (werk)relatie met uw werknemer vóór het ziekteverzuim?  
 Slecht (conflictueus)  
 Matig  
 Redelijk  
 Goed (harmonieus)
  
5. Hoe is uw (werk)relatie met uw werknemer nu?  
 Slecht (conflictueus)  
 Matig  
 Redelijk  
 Goed (harmonieus)

| 6. Heeft u sinds de ziekmelding met uw werknemer gesproken over de volgende onderwerpen?      |                                                                                 | Nee                                 | Ja                          |
|-----------------------------------------------------------------------------------------------|---------------------------------------------------------------------------------|-------------------------------------|-----------------------------|
| A.                                                                                            | Zijn/haar klachten                                                              | <input type="checkbox"/>            | <input type="checkbox"/>    |
| B.                                                                                            | De afdeling waar hij/zij werkt                                                  | <input type="checkbox"/>            | <input type="checkbox"/>    |
| C.                                                                                            | De contacten op zijn/haar werk                                                  | <input type="checkbox"/>            | <input type="checkbox"/>    |
| D.                                                                                            | De beperkingen als gevolg van zijn/haar klachten                                | <input type="checkbox"/>            | <input type="checkbox"/>    |
| E.                                                                                            | De mogelijkheden voor werkaanpassingen                                          | <input type="checkbox"/>            | <input type="checkbox"/>    |
| F.                                                                                            | De mogelijkheden voor werkhervatting                                            | <input type="checkbox"/>            | <input type="checkbox"/>    |
| G.                                                                                            | Problemen ten aanzien van werkhervatting                                        | <input type="checkbox"/>            | <input type="checkbox"/>    |
| H.                                                                                            | Oplossingen voor de problemen ten aanzien van werkhervatting                    | <input type="checkbox"/>            | <input type="checkbox"/>    |
| I.                                                                                            | Het realiseren van oplossingen voor de problemen ten aanzien van werkhervatting | <input type="checkbox"/>            | <input type="checkbox"/>    |
| J.                                                                                            | Een ander onderwerp, namelijk:<br>.....                                         | <input checked="" type="checkbox"/> |                             |
| 7A. Heeft u uw werknemer gestimuleerd om zijn/haar werk weer (gedeeltelijk) te hervatten?     |                                                                                 |                                     |                             |
|                                                                                               |                                                                                 | <input type="checkbox"/>            | Ja, ga verder met vraag 7B. |
|                                                                                               |                                                                                 | <input type="checkbox"/>            | Nee, ga verder met vraag 8. |
| 7B. Hoe heeft u uw werknemer gestimuleerd om zijn/haar werk weer (gedeeltelijk) te hervatten? |                                                                                 |                                     |                             |
| .....                                                                                         |                                                                                 |                                     |                             |
| .....                                                                                         |                                                                                 |                                     |                             |
| .....                                                                                         |                                                                                 |                                     |                             |
| .....                                                                                         |                                                                                 |                                     |                             |
| 8. Zijn er (tijdelijke) aanpassingen aan de werkzaamheden / taken gedaan voor uw werknemer?   |                                                                                 |                                     |                             |
|                                                                                               |                                                                                 | <input type="checkbox"/>            | Ja                          |
|                                                                                               |                                                                                 | <input type="checkbox"/>            | Nee                         |
|                                                                                               |                                                                                 | <input type="checkbox"/>            | N.v.t.                      |
| 9. Zijn er (tijdelijke) aanpassingen aan de werktijden van uw werknemer gedaan?               |                                                                                 |                                     |                             |
|                                                                                               |                                                                                 | <input type="checkbox"/>            | Ja                          |
|                                                                                               |                                                                                 | <input type="checkbox"/>            | Nee                         |
|                                                                                               |                                                                                 | <input type="checkbox"/>            | N.v.t.                      |

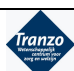

10. Heeft u een plan van aanpak voor werkhervatting gemaakt met uw werknemer  Ja  
 Nee  
 Nog niet
11. Heeft uw werknemer op dit moment zijn/haar werk hervat?  Ja, volledig  
 Ja, gedeeltelijk  
 Nee

### Contact met de bedrijfsarts over deze werknemer

De volgende vragen gaan over het contact dat u hebt gehad met de bedrijfsarts over uw werknemer sinds de ziekmelding.

12. Heeft u sinds de ziekmelding contact (per telefoon, per e-mail, een afspraak) gehad met de bedrijfsarts over uw werknemer?  Ja  
 Nee, ga verder met de vraag 22 / einde vragenlijst indien u de vragen 22 tot en met 43 al bij een eerdere werknemer hebt ingevuld
13. Hoeveel contacten heeft u sinds de ziekmelding met de bedrijfsarts gehad? ..... aantal
14. Hoe is uw (werk)relatie met de bedrijfsarts aangaande uw werknemer?  Slecht  
 Matig  
 Redelijk  
 Goed

|     |                                                                                                                                                                                       | Hele-<br>maal<br>oneens  | Enigs-<br>zins<br>oneens | Eens<br>noch<br>oneens   | Enigs-<br>zins<br>eens   | Hele-<br>maal<br>eens    | N.v.t.                   |
|-----|---------------------------------------------------------------------------------------------------------------------------------------------------------------------------------------|--------------------------|--------------------------|--------------------------|--------------------------|--------------------------|--------------------------|
| 15. | De bedrijfsarts ondersteunde mij om contact met mijn werknemer te blijven houden gedurende het verzuim en het werkhervattingproces.                                                   | <input type="checkbox"/> | <input type="checkbox"/> | <input type="checkbox"/> | <input type="checkbox"/> | <input type="checkbox"/> | <input type="checkbox"/> |
| 16. | Met de informatie van de bedrijfsarts weet ik beter hoe het herstelproces van een werknemer met psychische klachten eruit kan zien.                                                   | <input type="checkbox"/> | <input type="checkbox"/> | <input type="checkbox"/> | <input type="checkbox"/> | <input type="checkbox"/> | <input type="checkbox"/> |
| 17. | Met het advies van de bedrijfsarts weet ik beter hoe ik mijn werknemers kan ondersteunen bij zijn/haar herstel en werkhervatting.                                                     | <input type="checkbox"/> | <input type="checkbox"/> | <input type="checkbox"/> | <input type="checkbox"/> | <input type="checkbox"/> | <input type="checkbox"/> |
| 18. | De bedrijfsarts leek deskundig.                                                                                                                                                       | <input type="checkbox"/> | <input type="checkbox"/> | <input type="checkbox"/> | <input type="checkbox"/> | <input type="checkbox"/> |                          |
| 19. | Over het algemeen, vond ik het contact met de bedrijfsarts over deze werknemer prettig.                                                                                               | <input type="checkbox"/> | <input type="checkbox"/> | <input type="checkbox"/> | <input type="checkbox"/> | <input type="checkbox"/> |                          |
| 20. | Over het algemeen, was het contact met de bedrijfsarts over deze werknemer nuttig.                                                                                                    | <input type="checkbox"/> | <input type="checkbox"/> | <input type="checkbox"/> | <input type="checkbox"/> | <input type="checkbox"/> |                          |
| 21. | Hoe tevreden bent u, alles bij elkaar genomen, over het contact met de bedrijfsarts over deze werknemer? Geef een cijfer van 1 tot en met 10 (1 = erg ontevreden, 10 = erg tevreden). |                          |                          |                          |                          |                          | .....                    |

## Uw ervaring met werknemers met psychische klachten en ziekteverzuim in het algemeen

De volgende uitspraken gaan over hoe u de begeleiding van werknemers met psychische klachten over het algemeen ervaart.

22. Het begeleiden van werknemers met psychische klachten vind ik over het algemeen

|              |          |          |           |               |
|--------------|----------|----------|-----------|---------------|
| Erg moeilijk | Moeilijk | Neutraal | Makkelijk | Erg makkelijk |
|--------------|----------|----------|-----------|---------------|

23. Het begeleiden van werknemers met psychische klachten vind ik over het algemeen

|                  |             |          |           |                |
|------------------|-------------|----------|-----------|----------------|
| Zeer onplezierig | Onplezierig | Neutraal | Plezierig | Zeer plezierig |
|------------------|-------------|----------|-----------|----------------|

24. Over de manier waarop ik werknemers met psychische klachten begeleid ben ik over het algemeen

|                 |            |          |          |               |
|-----------------|------------|----------|----------|---------------|
| Zeer ontevreden | Ontevreden | Neutraal | Tevreden | Zeer tevreden |
|-----------------|------------|----------|----------|---------------|

25. Heeft u eerder werknemers die verzuimen wegens psychische klachten gehad?  Ja  
 Nee

De volgende vragen gaan over werkhervatting en werkaanpassingen. Kruis per vraag 1 hokje aan dat het beste aansluit bij uw opvatting.

|                                                                                                   | Zelden of nooit          | Soms                     | Vaak                     | Zeer vaak                |
|---------------------------------------------------------------------------------------------------|--------------------------|--------------------------|--------------------------|--------------------------|
| 26. Gedeeltelijke werkhervatting (als eerste stap naar volledige werkhervatting) vind ik zinvol   | <input type="checkbox"/> | <input type="checkbox"/> | <input type="checkbox"/> | <input type="checkbox"/> |
| 27. Gedeeltelijke werkhervatting (als eerste stap naar volledige werkhervatting) vind ik haalbaar | <input type="checkbox"/> | <input type="checkbox"/> | <input type="checkbox"/> | <input type="checkbox"/> |
| 28. Tijdelijke werkaanpassingen vind ik zinvol                                                    | <input type="checkbox"/> | <input type="checkbox"/> | <input type="checkbox"/> | <input type="checkbox"/> |
| 29. Tijdelijke werkaanpassingen vind ik haalbaar                                                  | <input type="checkbox"/> | <input type="checkbox"/> | <input type="checkbox"/> | <input type="checkbox"/> |
| 30. Permanente werkaanpassingen vind ik zinvol                                                    | <input type="checkbox"/> | <input type="checkbox"/> | <input type="checkbox"/> | <input type="checkbox"/> |
| 33. Permanente werkaanpassingen vind ik haalbaar                                                  | <input type="checkbox"/> | <input type="checkbox"/> | <input type="checkbox"/> | <input type="checkbox"/> |
| 34. Ik heb de mogelijkheid om werkaanpassingen te realiseren                                      | <input type="checkbox"/> | <input type="checkbox"/> | <input type="checkbox"/> | <input type="checkbox"/> |



## Verzuimbeleid

De volgende vragen gaan over het verzuimbeleid van uw afdeling of organisatie.

35. Heeft uw afdeling of organisatie een verzuimbeleid?  Ja  
 Nee
36. Wie begeleidt normaal gesproken de werknemer tijdens het ziekteverzuim en het werkhervattingproces?  
*Meerdere antwoorden mogelijk*
- Leidinggevende  
 Bedrijfsarts  
 Verzuimconsulent  
 Personeelsfunctionaris  
 Bedrijfsmaatschappelijk werk  
 Niemand  
 Weet ik niet  
 Anders, nl:  
.....  
.....
- 38A Heeft u scholing gehad in het omgaan met werknemers met psychische klachten?  Ja, ga naar vraag 38B en 38C  
 Nee, ga naar vraag 39
- 38B Indien Ja, van wie heeft u scholing gekregen? .....
- 38C Wat is de kern van wat u heeft geleerd in die scholing?  
.....  
.....

## Algemene gegevens

De vragen in dit blok gaan over algemene zaken die met u of uw werk te maken hebben.

39. Wat is uw geslacht?  
 Vrouw  
 Man
40. Wat is uw geboortedatum? ..... - ..... - 19.....
41. Wat is uw nationaliteit?  
 Nederlands(e)

Anders, namelijk: .....

42. Wat is de hoogste opleiding die u hebt voltooid?

Geen opleiding gevolgd, afgemaakt

Basisonderwijs

VMBO, LBO, MAVO

MBO

HAVO, VWO

HBO

Universiteit

Anders, namelijk: .....

43. Wat is uw huidige werk, functie?

.....

#### Ruimte voor opmerkingen

.....

.....

.....

.....

.....

.....

.....

.....

Dit is het einde van de vragenlijst.

**Hartelijk bedankt voor het invullen van de vragenlijst!**

U kunt de vragenlijst opsturen in de bijgevoegde antwoordenvolop naar:

*Universiteit van Tilburg - Tranzo*

*Kamernummer: T529, T.a.v. drs. K. van Beurden*

*Antwoordnummer 412*

*5000 WB Tilburg*

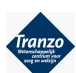

Supplement: 1471-2458-13-193-S1.pdf [file 1471-2458-13-193-S1.pdf]
